# Supplementary material
Source: PubMed Central journal article supplement (PMC10265297)
Supplement: jama-e236780-s001.pdf [file jama-e236780-s001.pdf]

## Supplement 1

1  
2  
3  
4  
5  
6  
7  
8  
9  
10  
11

This supplement contains the following items

1. Original protocol
2. Summary of changes to the protocol
3. Original statistical analysis plan
4. Consort checklist – Original trial
5. Consort checklist – Research letter

|    |                                                     |    |
|----|-----------------------------------------------------|----|
| 12 | TABLE OF CONTENTS                                   |    |
| 13 | ORIGINAL PROTOCOL                                   | 3  |
| 14 | SUMMARY OF CHANGES TO THE PROTOCOL                  | 9  |
| 15 | ORIGINAL STATISTICAL ANALYSIS PLAN                  | 10 |
| 16 | SUMMARY OF CHANGES TO THE STATISTICAL ANALYSIS PLAN | 20 |
| 17 | CONSORT CHECKLIST ORIGINAL TRIAL                    | 21 |
| 18 | CONSORT CHECKLIST - RESEARCH LETTER                 | 23 |
| 19 |                                                     |    |
| 20 |                                                     |    |

21  
22

Original protocol  
(from February 13<sup>th</sup> 2018)

## 23 **Spinal cord burst stimulation in patients with failed back surgery syndrome: A** 24 **randomized double-blind sham-controlled crossover trial**

25

26 Sasha Gulati MD PhD (1,2), Sozaburo Hara MD (1), Sven M. Carlsen MD PhD (3,4), Ole Solheim MD PhD  
27 (1,2), Jan V. Jørgensen MD (1), Kristin Taraldsen PhD (2), Tomm B. Müller MD PhD (1), Øystein P.  
28 Nygaard MD PhD (1,2), Mattis A. Madsbu MS (1,2), Astrid Brautaset MD (5), Erling A. Tronvik MD PhD  
29 (2,6), Eirik Amundal MD (5,6), Agnete M. Gulati MD (2,8), Asgeir S. Jakola MD PhD (9), Tore K. Solberg  
30 MD PhD (10), Petter Borchgrevink MD PhD (5), and Øyvind Salvesen MSc PhD (11)

31

32 1. Department of Neurosurgery, St. Olavs University Hospital 2. Department of Neuromedicine and Movement Science, NTNU 3. Department  
33 of Endocrinology, St. Olavs University Hospital 4. Department of Clinical and Molecular Medicine, NTNU 5. Norwegian Advisory Unit on  
34 Complex Symptom Disorders, St. Olavs University Hospital 6. Department of Neurology, St. Olavs University Hospital 7. Department of  
35 Anesthesia, St. Olavs University Hospital 8. Department of Rheumatology, St. Olavs University Hospital 9. Department of Neurosurgery,  
36 Sahlgrenska University Hospital, Gothenburg, Sweden 10. Department of Neurosurgery and Norwegian Spine Registry, University of Hospital  
37 of North Norway 11. Department of Public Health and Nursing, NTNU

38

### 39 **1. Relevance relative to the call for proposals**

40 Funding is sought for one ph.d. student for a period of 3 years within the framework of the project. The  
41 study is in compliance with the strategic documents of *the Central Norway Regional Health Authority, St.*  
42 *Olavs Hospital* and *the Department of Neuromedicine and Movement Science (INB)*, NTNU. This trial  
43 focuses on patient-related clinical research, medical technology, patient safety and cost-effectiveness.  
44 Management of chronic back pain seems to interest not only medical researchers and decision makers but  
45 also the general public and receives constant media attention. The trial is highly relevant to society and may  
46 benefit large groups of patients on both a national and international level. Funding of a ph.d. student is  
47 important to maintain our status as a leading international research group on degenerative spinal disorders.

48

### 49 **2. Background and status of knowledge**

50 The Global Burden of Disease study tracks the prevalence of deaths and diseases worldwide and uses a  
51 metric called “Disability Adjusted Life Years” (DALYs).<sup>1</sup> DALYs combine the number of years of life a  
52 person loses if they die prematurely with the amount of time they spend living with a disability. Think of it  
53 as time patients did not spend living their *#bestlife* – because of illness or death. In developed countries, the  
54 number one cause of these DALYs is not surprising: ischemic heart disease. However, the number two  
55 condition is perhaps a bit surprising: plain, old-fashioned, ever-present, back pain. In fact, low back pain is  
56 the leading cause of activity limitation and work absence throughout much of the world, and it is an  
57 enormous economic burden on the whole society ranging from individuals, families, communities, industry  
58 and all the way to governments.<sup>2</sup> Back pain affects people of all ages<sup>3,4</sup> and although the natural course  
59 often is favorable, more than 5,000 patients undergo spine surgery annually in Norway alone. The most  
60 common reasons for low back surgery are persisting or intolerable pain due to sciatica and narrowing of the  
61 spinal canal (i.e. spinal stenosis).<sup>5,6</sup> Unfortunately, 10-40% of patients who undergo spine surgery  
62 experience persisting or worsening of pain and disability.<sup>7</sup> Spinal cord stimulation (SCS) is a commonly  
63 established therapy to treat chronic neuropathic pain of various etiologies (Figure 1). One of the most  
64 common indications for SCS is failed back surgery syndrome (FBSS), a persistent or recurrent complex  
65 chronic pain syndrome with mixed neuropathic/radicular and nociceptive (e.g., mechanical, inflammatory)  
66 elements following spine surgery.<sup>8</sup> In traditional SCS therapies, the objective has been to replace the pain  
67 sensation with paresthesia that requires mapping of stimulation to the region of pain. The anticipation is that  
68 the electrical current alters pain processing by masking the sensation of pain with a comfortable tingling or  
69 paresthesia. Although patients mostly cope with paresthesia, a significant proportion reports that the  
70 sensation is unpleasant, particularly with positional changes. The stimulation is provided either through  
71 electrodes that are placed through a small skin incision into the epidural space or through a surgical paddle  
72 lead that is delivered via a laminotomy or laminectomy. Patients typically undergo a testing period of  
73 neuromodulation with an externalized power source and if this test proves to be positive and compelling,  
74 they subsequently have a subcutaneously implantable pulse generator (“pacemaker”) for long-term therapy.

75

76 The field of neuromodulation for the treatment of pain has developed rapidly since the seminal paper on the  
77 electrical inhibition of pain by stimulation of the dorsal column more than 50 years ago.<sup>9</sup> As is often the case  
78 in surgery, the widespread use of SCS has not been backed by solid evidence. The existing SCS literature is  
79 dominated a large number of case series reports and only a limited number of high quality, industry-  
80 independent, large prospective, consecutively recruited, randomized, or controlled comparative trials.<sup>10-16</sup>  
81 The absence of placebo-controlled trials has long been an important point of criticism of the stimulation  
82 literature. Due to the to the nature of the interventions with the sensation of paresthesia, studies with placebo  
83 control have not been considered possible. However, recent advances in SCS allow paresthesia-free  
84 stimulation.<sup>17</sup> Burst stimulation, utilizes complex programming to deliver high-frequency stimuli of a 40 Hz  
85 burst mode with 5 spikes at 500 Hz per spike delivered in a constant current mode. Using this methodology,  
86 it has been suggested that burst SCS may provide paresthesia-free stimulation resulting in better pain relief  
87 of low back and leg pain when compared to traditional tonic stimulation.<sup>18</sup> Moreover, this programming  
88 mode also allows comparison with placebo stimulation since the stimulation is often undetected by the  
89 patient. In the literature, SCS is reported as a safe procedure due to its reversible and minimally invasive  
90 characteristics.<sup>19</sup> Although catastrophic complications are possible (i.e. neurological injury, epidural  
91 hematoma), they are extremely rare. However, the incidence of minor complications of SCS (i.e. lead  
92 fracture, lead migration, infection, discomfort at implant site, implantable pulse generator seroma, dural  
93 puncture) is reported at around 30%-40%. These minor complications tend to occur within 12 months of  
94 implantation and are readily reversible and generally resolved. Although SCS is an established treatment,  
95 questions concerning treatment effects and cost-effectiveness remain unanswered, especially for burst SCS.

96  
97 The aim of this randomized double-blind sham-controlled crossover trial is to evaluate the efficacy of burst  
98 SCS in patients with FBSS.

99

### 100 **3. Topics and objectives**

#### 101 **3.1 Primary outcome measure**

102 The primary outcome is difference in change from baseline on the Oswestry disability index (ODI), version  
103 2.0, between active burst stimulation and placebo stimulation periods.<sup>20,21</sup> The ODI questionnaire quantifies  
104 disability for degenerative conditions of the lumbar spine and covers intensity of pain, ability to lift, ability  
105 to care for oneself, ability to walk, ability to sit, sexual function, ability to stand, social life, sleep quality,  
106 and ability to travel. For each topic there are six statements describing potential scenarios, and patients  
107 select the one that most closely resembles their situation. The index is scored from 0 to 100. Zero means no  
108 disability and 100 reflects maximum disability.

#### 109 **3.2 Secondary outcome measures**

- 110 • Changes in generic health-related quality of life measured with the Euro-Qol-5D
- 111 • Back pain and leg pain measured using numerical rating scales (NRS)
- 112 • Brief Pain Inventory (Short form)
- 113 • Level of physical activity
- 114 • Cost-effectiveness
- 115 • Use of analgesics

116

117

118 **Figure 1. The concept of burst spinal cord stimulation**

119

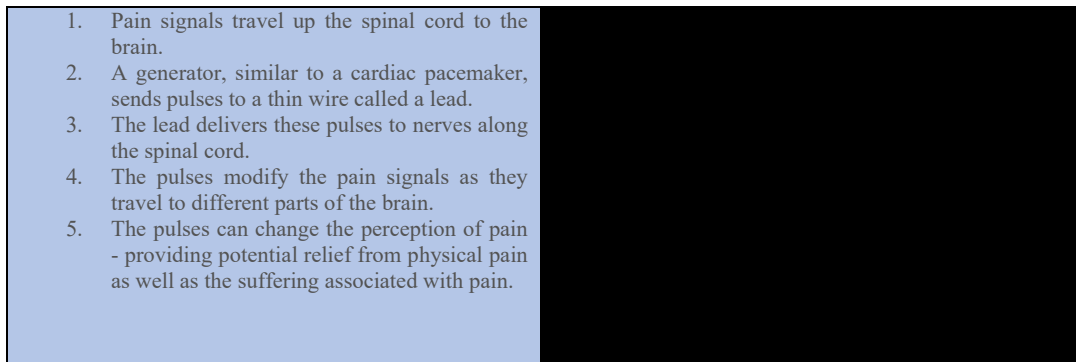

120

121 **4. Methods and materials**

122 **4.1 Study population, ethics, trial registration and user involvement**

123 The study will be conducted at St. Olavs University Hospital. SCS procedures have been performed at the  
124 Department of Neurosurgery for thirty years, and 30-40 patients undergo the procedure annually. The  
125 Norwegian Back Pain Association (*Ryggforeningen*) will be provided the opportunity to review the study  
126 protocol and give feedback concerning study design and outcome measures. An application for ethical  
127 approval will be submitted to The Regional Committee for Medical Research in Central-Norway. The study  
128 will be registered in Clinicaltrials.gov.

129

130 **4.1 Inclusion criteria**

- 131 1. Patients  $\geq 18$  years who have undergone  $\geq 1$  back surgeries and later developed FBSS, defined as  
132 chronic, intractable pain of the trunk and/or limbs that has remained refractory to non-surgical  
133 treatment for  $\geq 6$  months.
- 134 2. Minimum pain intensity of 5/10 on the NRS at baseline.
- 135 3. Successful two-week SCS testing period with tonic stimulation ( $\geq 30\%$  reduction in NRS from  
136 baseline). This means patients will experience paresthesia during the SCS trial period.
- 137 4. Mandatory assessment at the Norwegian Advisory Unit on Complex Symptom Disorders, St. Olavs  
138 University Hospital.

139

140 **4.2 Exclusion criteria**

- 141 1. Coexisting conditions that would increase procedural risk (e.g., sepsis, coagulopathy).
- 142 2. History of laminectomy or posterior fusion at the thoracolumbar junction, where percutaneous  
143 electrode end tips are routinely placed.
- 144 3. Abnormal pain behavior and/or unresolved psychiatric illness.
- 145 4. Unresolved issues of secondary gain or inappropriate medication use.

146

147 **4.3 Follow-up during the study**

148 During the 12 months following implantation the patients will undergo four three-month long periods with  
149 either burst SCS or no stimulation (sham) in a randomized order. All patients will undergo two periods of  
150 SCS and sham stimulation. The outcome measures will be collected prior to the test period and at the end of  
151 each of the four treatment periods.

152

153 **4.4 “Pentablinding” of the study**

154 The patients will be blinded to the actual treatment allocation during the different study periods (first  
155 blinding). The surgeons and all study personnel involved in handling the patients and collecting the study  
156 data (except those who perform the actual setting of the device) will be blinded to the actual treatment  
157 allocation (second blinding). All study personnel evaluation end points measures will be blinded to the  
158 actual treatment (third blinding). All the tables and figures to be presented from the study will be settled  
159 before any data from the study is evaluated in order to avoid selective presentation of findings according to

160 statistical results (fourth blinding). The statistician performing the statistical procedures on the outcome of  
161 the study will be blinded. The data will only show treatment allocation as treatment A and treatment B. Then  
162 the tables and figures are filled in (fifth blinding). In order to minimize the possibility of incidental  
163 unblinding the main outcome measure will be evaluated first, the secondary endpoints and lastly adverse  
164 effects. All statistical analyses will be predefined before commencement of the study. Only after all this has  
165 been performed and the procedures documented at the Unit for Applied Clinical Research (NTNU), the  
166 codes will be broken. The only remaining procedure will then be to substitute treatment A and B in the  
167 tables and figures with active and placebo. This ambitious procedure will secure maximum possible blinding  
168 of the study, integrity of the study and make the study results trustworthy.

169

#### 170 **4.5 Sample size calculation**

171 For the sample size calculation, the outcome variable is defined as the difference between each participant's  
172 mean ODI scores under "treatment A" and "treatment B". Assuming that the population mean and the  
173 standard deviation for the differences are 10 and 18, respectively, a one sample t-test of the differences at  
174 the 5% significance level needs 34 study participants to achieve 90% power.

175

#### 176 **5. Description of the research group**

177 This study unites several groups at INB (NTNU) and St. Olavs Hospital, as well as both national and  
178 international collaborators. Most of the researchers involved have extensive research experience,  
179 longstanding collaborations, and have published in top tier journals together. The project leader, professor  
180 Gulati, has already supervised several master and ph.d. students. There is a need for a ph.d. student and this  
181 student will join an established and productive research group with a friendly and constructive working  
182 environment.

183

#### 184 **6. Activity plan, publishing and plan for implementation**

185 The study will commence when funding and ethical approval has been obtained, hopefully in September  
186 2018. Data collection should be completed by March 2021, and data analyses, interpretation of results and  
187 writing of the manuscript will be completed by March 2022. This study will give rise to at least one  
188 scholarly publication that will be published in a high-ranking international peer-reviewed journal. Results  
189 will also be presented at both national and international scientific meetings and conferences. Further, we will  
190 focus on popular science dissemination through local and national media channels and social media  
191 channels.

192

193

194

195

196 **7. Budget**

197 Funding is sought for one ph.d. student. Payroll expenses for other members of the group are covered by  
198 their current employers. The Department of Neurosurgery will cover all expenses for inpatient treatment and  
199 SCS implant costs. Funding will later be sought for one research nurse.

200

201 **8. References**

202 1. Global, regional, and national disability-adjusted life-years (DALYs) for 333 diseases and injuries and healthy life expectancy (HALE)  
203 for 195 countries and territories, 1990-2016: a systematic analysis for the Global Burden of Disease Study 2016. *Lancet (London,*  
204 *England)*. 2017;390(10100):1260-1344.

205 2. Hoy D, March L, Brooks P, et al. The global burden of low back pain: estimates from the Global Burden of Disease 2010 study.  
206 *Annals of the rheumatic diseases*. 2014;73(6):968-974.

207 3. Giannadakis C, Solheim O, Jakola AS, et al. Surgery for Lumbar Spinal Stenosis in Individuals Aged 80 and Older: A Multicenter  
208 Observational Study. *J Am Geriatr Soc*. 2016;64(10):2011-2018.

209 4. Gulati S, Madsbu MA, Solberg TK, et al. Lumbar microdiscectomy for sciatica in adolescents: a multicentre observational registry-  
210 based study. *Acta neurochirurgica*. 2017;159(3):509-516.

211 5. Madsbu MA, Solberg TK, Salvesen O, Nygaard OP, Gulati S. Surgery for Herniated Lumbar Disk in Individuals 65 Years of Age or  
212 Older: A Multicenter Observational Study. *JAMA Surg*. 2017.

213 6. Nerland US, Jakola AS, Solheim O, et al. Minimally invasive decompression versus open laminectomy for central stenosis of the  
214 lumbar spine: pragmatic comparative effectiveness study. *BMJ (Clinical research ed)*. 2015;350:h1603.

215 7. Nerland US, Jakola AS, Giannadakis C, et al. The risk of getting worse: Predictors of deterioration after decompressive surgery for  
216 lumbar spinal stenosis - A multicenter observational study. *World neurosurgery*. 2015.

217 8. Grider JS, Manchikanti L, Carayannopoulos A, et al. Effectiveness of Spinal Cord Stimulation in Chronic Spinal Pain: A Systematic  
218 Review. *Pain physician*. 2016;19(1):E33-54.

219 9. Shealy CN, Mortimer JT, Reswick JB. Electrical inhibition of pain by stimulation of the dorsal columns: preliminary clinical report.  
220 *Anesthesia and analgesia*. 1967;46(4):489-491.

221 10. Kapural L, Yu C, Doust MW, et al. Novel 10-kHz High-frequency Therapy (HF10 Therapy) Is Superior to Traditional Low-frequency  
222 Spinal Cord Stimulation for the Treatment of Chronic Back and Leg Pain: The SENZA-RCT Randomized Controlled Trial.  
223 *Anesthesiology*. 2015;123(4):851-860.

224 11. Kapural L, Yu C, Doust MW, et al. Comparison of 10-kHz High-Frequency and Traditional Low-Frequency Spinal Cord Stimulation  
225 for the Treatment of Chronic Back and Leg Pain: 24-Month Results From a Multicenter, Randomized, Controlled Pivotal Trial.  
226 *Neurosurgery*. 2016;79(5):667-677.

227 12. Kumar K, Taylor RS, Jacques L, et al. Spinal cord stimulation versus conventional medical management for neuropathic pain: a  
228 multicentre randomised controlled trial in patients with failed back surgery syndrome. *Pain*. 2007;132(1-2):179-188.

229 13. North RB, Kidd DH, Farrokhi F, Piantadosi SA. Spinal cord stimulation versus repeated lumbosacral spine surgery for chronic pain: a  
230 randomized, controlled trial. *Neurosurgery*. 2005;56(1):98-106; discussion 106-107.

231 14. Perruchoud C, Eldabe S, Batterham AM, et al. Analgesic efficacy of high-frequency spinal cord stimulation: a randomized double-  
232 blind placebo-controlled study. *Neuromodulation : journal of the International Neuromodulation Society*. 2013;16(4):363-369;  
233 discussion 369.

234 15. Schu S, Sloty PJ, Bara G, von Knop M, Edgar D, Vesper J. A prospective, randomised, double-blind, placebo-controlled study to  
235 examine the effectiveness of burst spinal cord stimulation patterns for the treatment of failed back surgery syndrome.  
236 *Neuromodulation : journal of the International Neuromodulation Society*. 2014;17(5):443-450.

237 16. Schultz DM, Webster L, Kosek P, Dar U, Tan Y, Sun M. Sensor-driven position-adaptive spinal cord stimulation for chronic pain.  
238 *Pain physician*. 2012;15(1):1-12.

239 17. De Andres J, Monsalve-Dolz V, Fabregat-Cid G, et al. Prospective, Randomized Blind Effect-on-Outcome Study of Conventional vs  
240 High-Frequency Spinal Cord Stimulation in Patients with Pain and Disability Due to Failed Back Surgery Syndrome. *Pain medicine*  
241 *(Malden, Mass)*. 2017;18(12):2401-2421.

242 18. De Ridder D, Plazier M, Kamerling N, Menovsky T, Vanneste S. Burst spinal cord stimulation for limb and back pain. *World*  
243 *neurosurgery*. 2013;80(5):642-649.e641.

244 19. Verrills P, Sinclair C, Barnard A. A review of spinal cord stimulation systems for chronic pain. *Journal of pain research*. 2016;9:481-  
245 492.

246 20. Fairbank JC, Couper J, Davies JB, O'Brien JP. The Oswestry low back pain disability questionnaire. *Physiotherapy*. 1980;66(8):271-  
247 273.

248 21. Grotle M, Brox JI, Vollestad NK. Cross-cultural adaptation of the Norwegian versions of the Roland-Morris Disability Questionnaire  
249 and the Oswestry Disability Index. *J Rehabil Med*. 2003;35(5):241-247.

250

251



## Summary of changes to the protocol

252

253

254 1. In the original inclusion criteria (§4.1) we stated that all study participants had to undergo a mandatory  
255 assessment at the Norwegian Advisory Unit on Complex Symptom Disorders, St. Olavs University Hospital.  
256 Due to logistical issues this was changed to a mandatory assessment at the Multidisciplinary outpatient  
257 clinic for back, neck, and shoulder rehabilitation, St. Olavs University Hospital. This change was also made  
258 to the registration in Clinicaltrials.gov.

259

260 2. The Brief Pain Inventory and use of analgesics were specified as secondary outcomes in the trial protocol  
261 (§3.2) but were omitted before trial registration and commencement of the trial. The reason for omitting the  
262 Brief Pain Inventory was that pain is extensively covered by the other self-reported outcomes. The reason  
263 for omitting use of analgesics was that we did not want to overburden the study participants with data  
264 registration; several analgesics (ie, acetaminophen [paracetamol], ibuprofen) are available over-the-counter  
265 without a prescription and inappropriate medication use was an exclusion criterion.

266

267 3. A limitation of the trial was that blinding of treatment allocation prohibited repeated fine-tuning of  
268 stimulation parameters in completely open dialogue with patients and the use of paresthesia-inducing tonic  
269 stimulation. A post-hoc analysis was therefore planned to investigate Oswestry disability index scores 6  
270 months following completion of the final randomization period. The post-trial follow-up study was  
271 approved by the Regional Ethical Committee in South East Norway. The aim of the follow-up study was to  
272 compare back pain-related disability at 6 months following completion of the final randomization period  
273 when patients were unblinded and provided with handheld spinal cord stimulation programmers allowing  
274 changes to stimulation settings and switching between burst and tonic stimulation vs placebo stimulation  
275 during the randomized trial.

276

277

278

279

Original statistical analysis plan

280 1. Statistical Analysis Plan

281

282 The Statistical Analysis Plan of May 10<sup>th</sup> 2022 has not been changed and is final:

283

284 Administrative information:

|                           |                                                                                                                                                                 |
|---------------------------|-----------------------------------------------------------------------------------------------------------------------------------------------------------------|
| Sponsor name              | St. Olavs Hospital                                                                                                                                              |
| Sponsor address           | Nevroklinikken, 7006 Trondheim, Norway                                                                                                                          |
| REC no.                   | 2018/475                                                                                                                                                        |
| Trial title               | Spinal cord burst stimulation for chronic radicular neuropathic pain following lumbar spine surgery: A randomized double-blind sham- controlled crossover trial |
| Trial registration number | NCT03546738                                                                                                                                                     |

285

286

287 SAP and protocol version

|                      |                                                                                                                                 |
|----------------------|---------------------------------------------------------------------------------------------------------------------------------|
| SAP version and date | This SAP is version 1, dated May 10 <sup>th</sup> 2022                                                                          |
| Protocol version     | This document was written based on information contained in the study protocol version 1.0, dated January 18 <sup>th</sup> 2018 |

288

289 SAP revision history

| Protocol version | SAP version | Section number changed | Description and reason for change | Date changed              |
|------------------|-------------|------------------------|-----------------------------------|---------------------------|
| 1.0              | 1.0         | NA                     | First edition of SAP              | May 10 <sup>th</sup> 2022 |

290

291

Principal/coordinating investigator:

Consultant neurosurgeon Sozaburo Hara, MD  
Department of Neurosurgery  
St. Olavs Hospital  
7006 Trondheim, Norway



Signature

10.05.2022  
Date (dd/mm/yyyy)

Trial statistician:

Associate professor Øyvind O. Salvesen, MSc PhD  
Norwegian University of Science and Technology  
7006 Trondheim, Norway



Signature

10.05.2022  
Date (dd/mm/yyyy)

Main supervisor:

Consultant neurosurgeon and professor Sasha Gulati, MD PhD  
Department of Neurosurgery  
St. Olavs Hospital  
7006 Trondheim, Norway



Signature

10.05.2022  
Date (dd/mm/yyyy)

296 3. Abbreviations

|       |                                   |
|-------|-----------------------------------|
| SCS   | Spinal cord stimulation           |
| ODI   | Oswestry disability index         |
| NRS   | Numerical rating scale            |
| EQ-5D | EuroQol 5D                        |
| PROMs | Patient reported outcome measures |
| FAS   | Full analysis set                 |
| PPS   | Per protocol set                  |
| CCS   | Complete case set                 |

297

298

## 299 4. Introduction

300

### 301 4.1 Background and rationale

302 Spinal cord stimulation (SCS) is a widely applied therapy to treat chronic neuropathic pain, and one of the  
303 most common indications is persisting radicular neuropathic pain following lumbar spine surgery. In  
304 traditional SCS therapies, the objective has been to replace the pain sensation with paresthesia. The  
305 anticipation is that the electrical current alters pain processing by masking the sensation of pain with a  
306 comfortable tingling or paresthesia. Although patients mostly cope with paresthesia, a significant  
307 proportion reports that the sensation is unpleasant.

308 'Burst' SCS utilizes complex programming to deliver high-frequency stimuli. This SCS technique seems to  
309 provide paresthesia-free stimulation, resulting in better pain relief of low back and leg pain than traditional  
310 tonic stimulation.

311 The widespread use of SCS has not been backed by solid evidence. The absence of placebo-controlled trials  
312 has long been an important point of criticism, but due to the nature of the intervention with sensation of  
313 paresthesia, studies with placebo control have so far not been considered possible. When 'burst' SCS is  
314 used the stimulation is often unnoticed by the patient, allowing comparison with placebo stimulation.  
315 The aim of this randomized double-blind sham-controlled crossover trial is to evaluate the efficacy of  
316 'burst' spinal cord stimulation for chronic radicular pain following spine surgery.

317

### 318 4.2 Trial objectives

#### 319 4.2.1 Primary objective

320 The primary aim is to evaluate the efficacy of burst spinal cord stimulation versus sham/placebo for  
321 chronic radicular pain following spine surgery measured by the Oswestry disability index (ODI).

322

#### 323 4.2.2 Secondary objectives

324 The secondary objectives are to assess if there are any differences between active burst stimulation and  
325 sham/placebo with regards to:

326 Changes in health-related quality of life measured with the Euro-Qol-5D (EQ-5D)

327 Back pain and leg pain measured using numerical rating scales (NRS)

328 Daily physical activity measured by use of a body-worn accelerometer (activPALs from PAL Technologies  
329 Ltd., Glasgow, United Kingdom) attached by a waterproof tape to the midpoint of the patients' anterior  
330 right thigh

331 If the mean difference in ODI change between active stimulation and placebo exceeds the predefined  
332 minimal clinically important difference of 10 points, a cost-effectiveness analysis will be performed (health  
333 care providers' cost per gained quality-adjusted life year)

334

335 Secondary objectives also include complications and surgical revisions of the implanted SCS systems. At the  
336 end of each treatment period study participants were asked whether they believe they received active  
337 burst stimulation or not.

338

## 339 5. Trial methods

340

### 341 5.1 Trial design

342 This is a single center randomized controlled crossover study performed at St. Olavs Hospital, Trondheim,  
343 Norway. Both specialist health care services and general practitioners in Norway can refer patients for  
344 assessment of study eligibility. Initial assessment of study eligibility was performed at the Multidisciplinary  
345 outpatient clinic for back, neck and shoulder rehabilitation, St. Olavs Hospital. The surgical procedures and  
346 postoperative follow-up will be performed at the Department of Neurosurgery, St. Olavs Hospital.

347

348 5.2 Randomization

349 During the 12 months following spinal cord stimulator implantation the study participants will undergo  
350 four three-month long periods with either burst SCS or no stimulation (sham) in a randomized order. All  
351 patients had two periods of SCS and two with sham stimulation. The outcome measures were collected  
352 prior to the test period and at the end of each of the four treatment periods.

353

354 5.3 Sample size

355 For the sample size calculation, the outcome variable was defined as the difference between each  
356 participant’s mean ODI scores under “treatment A” and “treatment B”. Assuming that the population  
357 mean and the standard deviation for the differences are 10 and 18, respectively, a one sample t-test of the  
358 differences at the 5% significance level needs 34 study participants to achieve 90% power. Due to expected  
359 loss to follow-up of 10-20% and breakthrough of paresthesia during burst stimulation in 20-30% of patients  
360 we aimed at including a total of 50 study participants.

361

362 5.4 Statistical framework

363

364 5.4.1 Hypothesis test

365 First, a test of overall effect of treatment measured by ODI is performed. The null hypothesis is that there  
366 is no difference in mean change of ODI from baseline to the end of each intervention period between the  
367 active burst stimulation periods and the placebo periods. The alternative hypothesis is that there is a  
368 difference between active burst stimulation and sham/placebo. The test will be performed at the two-  
369 sided 5% significance level. A difference in the effect of the treatment arms will be claimed if the null  
370 hypothesis is rejected. That is, the two-sided p-value is less than 5%. Superiority of active burst stimulation  
371 will be claimed if the two-sided p-value in the test comparing the change from baseline is less than 5%, and  
372 if the effect goes in favor of active stimulation.

373

374 5.4.2 Statistical interim analyses and stopping guidance

375 There were no interim analyses in this trial.

376

377 5.4.3 Timing of final analysis

378 The main analysis is planned when all study participants have concluded a minimum of 360 days of follow-  
379 up following implantation of the complete SCS system, all data up to one year has been entered, verified  
380 and validated, and the primary database has been locked.

381

382 5.4.4 Timing of outcome assessments

383 For all clinically planned measures, visits should occur within a time window of the scheduled visit. Visits  
384 outside these predefined time windows are regarded as protocol deviations. The target day and time  
385 windows are defined as:

386

| Visit label                                                                                                               | Target day | Definition (Day window) |
|---------------------------------------------------------------------------------------------------------------------------|------------|-------------------------|
| Clinical assessment at the multidisciplinary outpatient clinic, initial evaluation of study eligibility, informed consent | -60        | Prior to Day 0          |
| Collection of patient reported outcome measures (PROMs) and activePAL                                                     | -40        | Prior to Day 0          |

|                                                                                                                               |                                                                                       |                           |
|-------------------------------------------------------------------------------------------------------------------------------|---------------------------------------------------------------------------------------|---------------------------|
| registration*                                                                                                                 |                                                                                       |                           |
| Trial stimulation<br>Registration of leg and back<br>pain NRS.                                                                | -14                                                                                   | Prior to Day 0            |
| Evaluation of trial<br>stimulation and final<br>evaluation of study<br>eligibility. Registration of leg<br>and back pain NRS. | Day 0<br>Eligible for study<br>participation: implantation<br>of complete SCS system. | Target day +/- 7 days     |
| 1 <sup>st</sup> randomization                                                                                                 | Day 1                                                                                 | Target day +/-2 days      |
| Collection of PROMs, 2 <sup>nd</sup><br>randomization                                                                         | Day 90 from implantation                                                              | Target day +/- 15 days    |
| activePAL registration*                                                                                                       | Day 90-180                                                                            | > 7 days prior to Day 180 |
| Collection of PROMs, 3 <sup>rd</sup><br>randomization                                                                         | Day 180 from implantation                                                             | Target day +/- 15 days    |
| activePAL registration*                                                                                                       | Day 180-270                                                                           | > 7 days prior to Day 270 |
| Collection of PROMs, 4 <sup>th</sup><br>randomization                                                                         | Day 270 from implantation                                                             | Target day +/- 15 days    |
| activePAL registration*                                                                                                       | Day 270-360                                                                           | > 7 days prior to Day 360 |
| Collection of PROMs, final<br>study visit                                                                                     | Day 360 from implantation                                                             | Target day +/- 15 days    |

387

388 \*Three activePAL registrations are planned: 1) prior to the trial stimulation 2) once during sham/placebo,  
389 and 3) once during active burst stimulation

390

391 5.5 Blinding procedure

392 Quadruple blinding:

393 Participant

394 Care Provider

395 Investigator

396 Outcomes Assessor

397

398 The patients were blinded to the actual treatment allocation during the different study periods. The  
399 surgeons and all study personnel involved in handling the patients and collecting the study data (except  
400 those who perform the actual setting of the device) were blinded to the actual treatment allocation. All  
401 study personnel evaluation end points measures will be blinded to the actual treatment. All the tables and  
402 figures to be presented from the study will be settled before any data from the study is evaluated to avoid  
403 selective presentation of findings according to statistical results. The statistician performing the statistical  
404 procedures on the outcome of the study will be blinded. The data will only show treatment allocation as  
405 treatment A and treatment B. Then the tables and figures are filled in. To minimize the possibility of  
406 incidental unblinding the main outcome measure will be evaluated first, then the secondary endpoints,  
407 and lastly adverse effects. Only after all this has been performed and the procedures documented at the  
408 Unit for Applied Clinical Research (NTNU), the codes will be broken. The only remaining procedure will  
409 then be to substitute treatment A and B in the tables and figures with active and placebo. This ambitious  
410 procedure will secure maximum possible blinding of the study, integrity of the study and make the study  
411 results trustworthy.

412

413 6. Statistical principles

414



415 6.1 Confidence intervals and p-values

416 All calculated p-values will be two-sided and compared to a 5% significance level. If a p-value is less than  
417 0.05, the null hypothesis will be discarded. Efficacy estimates for the two arms will be presented with two-  
418 sided 95% confidence intervals.

419

420 6.2 Adherence and protocol deviations

421 The number and proportion of patients that received the intervention they were randomized to will be  
422 presented

423

424 The following are pre-defined major protocol deviations regarded to affect the efficacy of the intervention:

425 Entering the trial when the eligibility criteria should have prevented trial entry

426 Outside the age criteria

427 Misdiagnosed

428 Insufficient leg pain NRS reduction following trial stimulation

429 Received other intervention than allocated to

430

431 The number (and percentage) of patients with major protocol deviations and detail of type of deviation will  
432 be provided. All randomized interventions will be used as the denominator to calculate the percentages.

433 No formal statistical testing will be undertaken.

434

435 6.3 Analysis populations

436 We define the following populations in this trial:

437 **All randomized patients:** All patients that have been randomized regardless if they actually received  
438 treatment or not.

439 **Full analysis set (FAS):** All patients that are randomized, received treatment, and where ODI was measured  
440 at least once post baseline/following implantation of the complete SCS system. Patients are allocated to  
441 the treatment period they were randomized to.

442 **Complete case set (CCS):** The subset of patients in the FAS that has ODI measurements at all follow-up  
443 visits. Patients are allocated to the treatment period they were randomized to.

444

445 The FAS will be used for the primary analysis, while the CCS will be used for sensitivity analyses.

446

447 7. Trial population

448

449 7.1 Screening data, eligibility, and recruitment

450 The total number of screened patients and reasons for not entering the trial will be summarized and  
451 tabulated. A CONSORT flow diagram will be used to summarize the number of patients who were:

452 Assessed for eligibility

453 Eligible at initial evaluation

454 Eligible at initial evaluation and underwent trial stimulation

455 Eligible following trial stimulation

456 Eligible following trial stimulation but not randomized\*

457 Received the randomized allocation

458 Did not receive the randomized allocation\*

459 Lost to follow-up

460 Randomized and included in the primary analysis

461 Randomized and excluded from the primary analysis\*

462

463 \*Reasons will be provided

464  
465 7.2 Withdrawal/Follow-up  
466 The status of eligible and randomized patients at trial end will be tabulated by treatment group according  
467 to whether they  
468 Completed intervention, but not assessments  
469 Completed assessments, but not intervention  
470 Withdrew consent  
471 Did not complete follow-up  
472 Unable to measure the primary endpoint due to:  
473 Comorbidity that compromised treatment or testing  
474 Death during follow-up  
475  
476 Time from randomization to treatment discontinuation and time from randomization to withdrawal/lost to  
477 follow-up will be presented graphically using a CONSORT flow diagram.  
478  
479 7.3 Baseline patient characteristics  
480 The patient demographics and baseline characteristics include age, gender, body-mass index, educational  
481 level, comorbidity, American Society of Anesthesiologists physical status grade, smoking status, number of  
482 previous spine surgeries, baseline activity level, and baseline PROMs. The patient demographics and  
483 baseline characteristics will be summarized and presented using descriptive statistics (N, mean, standard  
484 deviation, median) for continuous variables, and number and percentages of patients for categorical  
485 variables. As this is a crossover trial, important clinical imbalances between treatment arms are unlikely.  
486  
487 8. Analysis  
488  
489 8.1 Analysis of the primary efficacy endpoint  
490 8.1.2 Oswestry disability index (ODI)  
491 The primary outcome is difference in mean change from baseline in disease specific functional outcome  
492 (ODI version 2.0) between active burst stimulation and placebo/sham.(1)  
493  
494 ODI has been translated into Norwegian and tested for psychometric properties.(2) The ODI questionnaire  
495 is used to quantify disability for degenerative conditions of the lumbar spine and covers intensity of pain,  
496 ability to lift, ability to care for oneself, ability to walk, ability to sit, sexual function, ability to stand, social  
497 life, sleep quality, and ability to travel. For each topic there are six statements describing potential  
498 scenarios, and patients select the one that most closely resembles their situation. The index is scored from  
499 0 to 100. Zero means no disability and 100 reflects maximum disability.  
500  
501  
502 8.1.2 Statistical methods  
503 Mean +/- SD or summary statistics appropriate for the distribution will be reported for the primary  
504 outcome and each of the key secondary outcomes. The two interventions will be compared using a linear  
505 mixed model adjusting for random effects. The model will account for correlated data within the same  
506 subject. A 95% confidence interval will be reported for the difference between the interventions based on  
507 the linear mixed model. For the primary endpoint and other key endpoints listed in section 4, the type I  
508 error rate will be controlled at two-sided alpha = 0.05.  
509  
510 8.1.3 Missing data  
511 Missing data will not be imputed for the primary analysis in this study. All statistical methods for handling  
512 missing data rely on untestable assumptions and there is no one correct way to handle missing data. Our

513 goal is to minimize the amount of missing data so that the results will not be sensitive to which statistical  
514 method is used.

515

516

## 517 8.2 Analysis of the secondary endpoints

518 Regardless of the results of the primary outcome, summary statistics will be tabulated by treatment arm  
519 for EQ-5D, leg pain 0-10 NRS, back pain 0-10 NRS, and physical activity level (steps per day and time spent  
520 standing and walking). The two interventions will be compared using a linear mixed model adjusting for  
521 random effects. The Norwegian version of EQ-5D has shown good psychometric properties.(3) If the mean  
522 difference in ODI change between active stimulation and placebo exceeds the predefined minimal clinically  
523 important difference, a cost-effectiveness analysis will be performed (health care providers' cost per  
524 gained quality-adjusted life year)

### 525 8.2.1 Missing data

526 For the secondary outcomes, missing data will not be imputed in this study.

527

## 528 8.3 Subgroup analyses

529 No subgroup analyses are planned for this study.

## 530 9. Safety Analyses

531

### 532 9.1 Adverse Events

533 Complications, adverse events, and surgical revisions of the implanted SCS system are continuously  
534 registered and will presented. This includes but is not limited to thromboembolic events, wound healing  
535 problems, infections, postoperative hematoma, cerebrospinal fluid leak/unintentional durotomy, and  
536 nerve-damage.

537

### 538 9.2 Clinical Laboratory Parameters

539 Not applicable.

540

### 541 9.3 Vital Signs

542 Not applicable.

543

## 544 10. Statistical Software

545 All statistical analyses will be done using SPSS version 27 (IBM corp., Chicago, IL) and R version 3.6.3 (R  
546 Core Team, R: A language and environment for statistical computing. R Foundation for Statistical  
547 Computing, Vienna, Austria. URL <https://www.R-project.org/>).

548

## 549 11. References

550 1. Fairbank JC, Couper J, Davies JB, O'Brien JP. The Oswestry low back pain disability questionnaire.

551 Physiotherapy. 1980;66(8):271-3.

552 2. Grotle M, Brox JI, Vøllestad NK. Cross-cultural adaptation of the Norwegian versions of the Roland-  
553 Morris Disability Questionnaire and the Oswestry Disability Index. J Rehabil Med. 2003;35(5):241-7.

554 3. Solberg TK, Olsen JA, Ingebrigtsen T, Hofoss D, Nygaard OP. Health-related quality of life  
555 assessment by the EuroQol-5D can provide cost-utility data in the field of low-back surgery. Eur Spine J.

556 2005;14(10):1000-7.

557

558

## 559 Summary of changes to the statistical analysis plan

560 1. A limitation of the trial was that blinding of treatment allocation prohibited repeated fine-tuning of  
561 stimulation parameters in completely open dialogue with patients and the use of paresthesia-inducing tonic  
562 stimulation. A post-hoc analysis was performed to investigate Oswestry disability index scores 6 months  
563 following completion of the final randomization period. The post-trial follow-up study and publication of  
564 the results were approved by the Regional Ethical Committee in South East Norway. The aim of the follow-  
565 up study was to compare back pain-related disability at 6 months following completion of the final  
566 randomization period when patients were unblinded and provided with handheld spinal cord stimulation  
567 programmers allowing changes to stimulation settings and switching between burst and tonic stimulation vs  
568 placebo stimulation during the randomized trial. The primary endpoint was change in back pain-related  
569 disability measured with the ODI and the final endpoint collection was 6 months after completing the  
570 randomized trial. The primary statistical analyses were performed in the full analysis population, which  
571 included trial participants who had  $\geq 1$  ODI measurement(s) following randomization. Sensitivity analyses  
572 were performed in the complete case set, which included patients that had ODI measurements at all time  
573 points during the trial and post-trial follow-up. Linear mixed models were used for statistical comparisons.  
574 Statistical tests for the primary outcome were performed at the 2-sided significance level of 0.05.

575

576

## CONSORT CHECKLIST ORIGINAL TRIAL

577

578 **CONSORT 2010 checklist of information to include when reporting a randomised trial\***

579

580

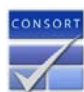

| Section/Topic                    | Item No | Checklist item                                                                                                                                                                              | Reported on page No |
|----------------------------------|---------|---------------------------------------------------------------------------------------------------------------------------------------------------------------------------------------------|---------------------|
| <b>Title and abstract</b>        |         |                                                                                                                                                                                             |                     |
|                                  | 1a      | Identification as a randomised trial in the title                                                                                                                                           | 1                   |
|                                  | 1b      | Structured summary of trial design, methods, results, and conclusions (for specific guidance see CONSORT for abstracts)                                                                     | 4, 5                |
| <b>Introduction</b>              |         |                                                                                                                                                                                             |                     |
| Background and objectives        | 2a      | Scientific background and explanation of rationale                                                                                                                                          | 6                   |
|                                  | 2b      | Specific objectives or hypotheses                                                                                                                                                           | 7                   |
| <b>Methods</b>                   |         |                                                                                                                                                                                             |                     |
| Trial design                     | 3a      | Description of trial design (such as parallel, factorial) including allocation ratio                                                                                                        | 7, 8                |
|                                  | 3b      | Important changes to methods after trial commencement (such as eligibility criteria), with reasons                                                                                          | NA                  |
| Participants                     | 4a      | Eligibility criteria for participants                                                                                                                                                       | 7,8                 |
|                                  | 4b      | Settings and locations where the data were collected                                                                                                                                        | 7                   |
| Interventions                    | 5       | The interventions for each group with sufficient details to allow replication, including how and when they were actually administered                                                       | 9-10                |
| Outcomes                         | 6a      | Completely defined pre-specified primary and secondary outcome measures, including how and when they were assessed                                                                          | 11                  |
|                                  | 6b      | Any changes to trial outcomes after the trial commenced, with reasons                                                                                                                       | NA                  |
| Sample size                      | 7a      | How sample size was determined                                                                                                                                                              | 11                  |
|                                  | 7b      | When applicable, explanation of any interim analyses and stopping guidelines                                                                                                                | NA                  |
| <b>Randomisation:</b>            |         |                                                                                                                                                                                             |                     |
| Sequence generation              | 8a      | Method used to generate the random allocation sequence                                                                                                                                      | 8,9                 |
|                                  | 8b      | Type of randomisation; details of any restriction (such as blocking and block size)                                                                                                         | 9                   |
| Allocation concealment mechanism | 9       | Mechanism used to implement the random allocation sequence (such as sequentially numbered containers), describing any steps taken to conceal the sequence until interventions were assigned | 9                   |
|                                  | 10      | Who generated the random allocation sequence, who enrolled participants, and who assigned participants to interventions                                                                     | 7                   |
| <b>Implementation</b>            |         |                                                                                                                                                                                             |                     |
| Blinding                         | 11a     | If done, who was blinded after assignment to interventions (for example, participants, care providers, those assessing outcomes) and how                                                    | 8, 9                |
|                                  | 11b     | If relevant, description of the similarity of interventions                                                                                                                                 | 9                   |
| Statistical methods              | 12a     | Statistical methods used to compare groups for primary and secondary outcomes                                                                                                               | 12, 13              |
|                                  | 12b     | Methods for additional analyses, such as subgroup analyses and adjusted analyses                                                                                                            | NA                  |

|                                                      |    |                                                                                                                                                   |                |
|------------------------------------------------------|----|---------------------------------------------------------------------------------------------------------------------------------------------------|----------------|
| <b>Results</b>                                       |    |                                                                                                                                                   |                |
| Participant flow (a diagram is strongly recommended) | 13 | For each group, the numbers of participants who were randomly assigned, received intended treatment, and were analysed for the primary outcome    | 14             |
|                                                      | 13 | For each group, losses and exclusions after randomisation, together with reasons                                                                  | 14 + figure 1  |
| Recruitment                                          | 14 | Dates defining the periods of recruitment and follow-up                                                                                           | 14             |
|                                                      | 14 | Why the trial ended or was stopped                                                                                                                | NA             |
| Baseline data                                        | 15 | A table showing baseline demographic and clinical characteristics for each group                                                                  | 24             |
| Numbers analysed                                     | 16 | For each group, number of participants (denominator) included in each analysis and whether the analysis was by original assigned groups           | 14             |
| Outcomes and estimation                              | 17 | For each primary and secondary outcome, results for each group, and the estimated effect size and its precision (such as 95% confidence interval) | 14, 15, 26, 27 |
|                                                      | 17 | For binary outcomes, presentation of both absolute and relative effect sizes is recommended                                                       | NA             |
| Ancillary analyses                                   | 18 | Results of any other analyses performed, including subgroup analyses and adjusted analyses, distinguishing pre-specified from exploratory         | NA             |
| Harms                                                | 19 | All important harms or unintended effects in each group (for specific guidance see CONSORT for harms)                                             | 15, 27         |
| <b>Discussion</b>                                    |    |                                                                                                                                                   |                |
| Limitations                                          | 20 | Trial limitations, addressing sources of potential bias, imprecision, and, if relevant, multiplicity of analyses                                  | 17, 18         |
| Generalisability                                     | 21 | Generalisability (external validity, applicability) of the trial findings                                                                         | 16, 17, 18     |
| Interpretation                                       | 22 | Interpretation consistent with results, balancing benefits and harms, and considering other relevant evidence                                     | 16, 17, 18     |
| <b>Other information</b>                             |    |                                                                                                                                                   |                |
| Registration                                         | 23 | Registration number and name of trial registry                                                                                                    | 5              |
| Protocol                                             | 24 | Where the full trial protocol can be accessed, if available                                                                                       | 7              |
| Funding                                              | 25 | Sources of funding and other support (such as supply of drugs), role of funders                                                                   | 20             |

581

582 \*We strongly recommend reading this statement in conjunction with the CONSORT 2010 Explanation and Elaboration for  
583 important clarifications on all the items. If relevant, we also recommend reading CONSORT extensions for cluster randomised  
584 trials, non-inferiority and equivalence trials, non-pharmacological treatments, herbal interventions, and pragmatic trials.

585 Additional extensions are forthcoming: for those and for up to date references relevant to this checklist, see [www.consort-](http://www.consort-statement.org)

586 [statement.org](http://www.consort-statement.org).

587

588

589  
590  
591  
592  
593

## CONSORT CHECKLIST - RESEARCH LETTER

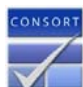

### CONSORT 2010 checklist of information to include when reporting a randomised trial\*

| Section/Topic                    | Item No | Checklist item                                                                                                                                                                              | Reported on page No |
|----------------------------------|---------|---------------------------------------------------------------------------------------------------------------------------------------------------------------------------------------------|---------------------|
| <b>Title and abstract</b>        |         |                                                                                                                                                                                             |                     |
|                                  | 1a      | Identification as a randomised trial in the title                                                                                                                                           | 1                   |
|                                  | 1b      | Structured summary of trial design, methods, results, and conclusions (for specific guidance see CONSORT for abstracts)                                                                     | NA                  |
| <b>Introduction</b>              |         |                                                                                                                                                                                             |                     |
| Background and objectives        | 2a      | Scientific background and explanation of rationale                                                                                                                                          | 3                   |
|                                  | 2b      | Specific objectives or hypotheses                                                                                                                                                           | 3                   |
| <b>Methods</b>                   |         |                                                                                                                                                                                             |                     |
| Trial design                     | 3a      | Description of trial design (such as parallel, factorial) including allocation ratio                                                                                                        | 3,4                 |
|                                  | 3b      | Important changes to methods after trial commencement (such as eligibility criteria), with reasons                                                                                          | NA                  |
| Participants                     | 4a      | Eligibility criteria for participants                                                                                                                                                       | 3,4                 |
|                                  | 4b      | Settings and locations where the data were collected                                                                                                                                        | 3                   |
| Interventions                    | 5       | The interventions for each group with sufficient details to allow replication, including how and when they were actually administered                                                       | 3,4                 |
| Outcomes                         | 6a      | Completely defined pre-specified primary and secondary outcome measures, including how and when they were assessed                                                                          | 4                   |
|                                  | 6b      | Any changes to trial outcomes after the trial commenced, with reasons                                                                                                                       | NA                  |
| Sample size                      | 7a      | How sample size was determined                                                                                                                                                              | NA                  |
|                                  | 7b      | When applicable, explanation of any interim analyses and stopping guidelines                                                                                                                | NA                  |
| <b>Randomisation:</b>            |         |                                                                                                                                                                                             |                     |
| Sequence generation              | 8a      | Method used to generate the random allocation sequence                                                                                                                                      | NA                  |
|                                  | 8b      | Type of randomisation; details of any restriction (such as blocking and block size)                                                                                                         | 3                   |
| Allocation concealment mechanism | 9       | Mechanism used to implement the random allocation sequence (such as sequentially numbered containers), describing any steps taken to conceal the sequence until interventions were assigned | NA                  |
|                                  | 10      | Who generated the random allocation sequence, who enrolled participants, and who assigned participants to interventions                                                                     | NA                  |
| <b>Implementation</b>            |         |                                                                                                                                                                                             |                     |
| Blinding                         | 11a     | If done, who was blinded after assignment to interventions (for example, participants, care providers, those assessing outcomes) and how                                                    | NA                  |
|                                  | 11b     | If relevant, description of the similarity of interventions                                                                                                                                 | NA                  |
| Statistical methods              | 12a     | Statistical methods used to compare groups for primary and secondary outcomes                                                                                                               | 4                   |
|                                  | 12b     | Methods for additional analyses, such as subgroup analyses and adjusted analyses                                                                                                            | NA                  |
| <b>Results</b>                   |         |                                                                                                                                                                                             |                     |

|                                                      |    |                                                                                                                                                   |      |
|------------------------------------------------------|----|---------------------------------------------------------------------------------------------------------------------------------------------------|------|
| Participant flow (a diagram is strongly recommended) | 13 | For each group, the numbers of participants who were randomly assigned, received intended treatment, and were analysed for the primary outcome    | 4    |
|                                                      | 13 | For each group, losses and exclusions after randomisation, together with reasons                                                                  | 4    |
| Recruitment                                          | 14 | Dates defining the periods of recruitment and follow-up                                                                                           | 3    |
|                                                      | 14 | Why the trial ended or was stopped                                                                                                                | NA   |
| Baseline data                                        | 15 | A table showing baseline demographic and clinical characteristics for each group                                                                  | NA   |
| Numbers analysed                                     | 16 | For each group, number of participants (denominator) included in each analysis and whether the analysis was by original assigned groups           | 4    |
| Outcomes and estimation                              | 17 | For each primary and secondary outcome, results for each group, and the estimated effect size and its precision (such as 95% confidence interval) | 4, 5 |
|                                                      | 17 | For binary outcomes, presentation of both absolute and relative effect sizes is recommended                                                       | NA   |
| Ancillary analyses                                   | 18 | Results of any other analyses performed, including subgroup analyses and adjusted analyses, distinguishing pre-specified from exploratory         | NA   |
| Harms                                                | 19 | All important harms or unintended effects in each group (for specific guidance see CONSORT for harms)                                             | 4    |
| <b>Discussion</b>                                    |    |                                                                                                                                                   |      |
| Limitations                                          | 20 | Trial limitations, addressing sources of potential bias, imprecision, and, if relevant, multiplicity of analyses                                  | 5    |
| Generalisability                                     | 21 | Generalisability (external validity, applicability) of the trial findings                                                                         | 5    |
| Interpretation                                       | 22 | Interpretation consistent with results, balancing benefits and harms, and considering other relevant evidence                                     | 5    |
| <b>Other information</b>                             |    |                                                                                                                                                   |      |
| Registration                                         | 23 | Registration number and name of trial registry                                                                                                    | 1    |
| Protocol                                             | 24 | Where the full trial protocol can be accessed, if available                                                                                       | 1    |
| Funding                                              | 25 | Sources of funding and other support (such as supply of drugs), role of funders                                                                   | 6    |

594

595 \*We strongly recommend reading this statement in conjunction with the CONSORT 2010 Explanation and Elaboration for  
596 important clarifications on all the items. If relevant, we also recommend reading CONSORT extensions for cluster randomised  
597 trials, non-inferiority and equivalence trials, non-pharmacological treatments, herbal interventions, and pragmatic trials.

598 Additional extensions are forthcoming: for those and for up to date references relevant to this checklist, see [www.consort-](http://www.consort-statement.org)  
599 [statement.org](http://www.consort-statement.org).

600

601

602
