# Supplementary material
Source: PubMed Central journal article supplement (PMC10265297)
Supplement: jama-e236780-s002.pdf [file jama-e236780-s002.pdf]

## Data Sharing Statement

Hara. Six-Month Follow-up of a Trial of Spinal Cord Burst Stimulation vs Placebo Stimulation on Disability in Patients With Chronic Radicular Pain After Lumbar Spine Surgery. *JAMA*. Published June 13, 2023. doi:10.1001/jama.2023.6780

### Data

**Data available:** No
